# Supplementary material
Source: publisher site journal article supplement (https://www.dovepress.com/article/496873)
Supplement: Supplementary file 1 [file get_supplementary_file.php]

**Supporting Information**

**
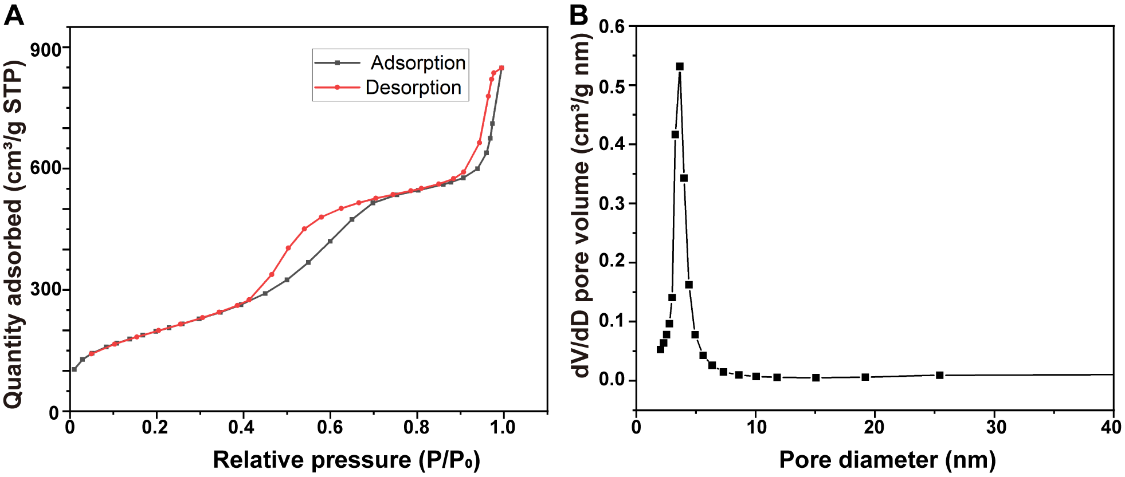
**

**Figure S1.** A: The N2 adsorption-desorption curves of MMSNs; B: Pore size distribution of MMSNs.

**
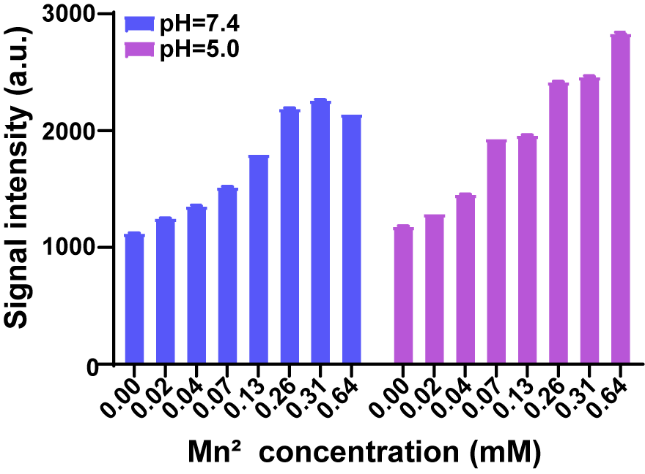
**

**Figure S2.** Quantitative analysis of MR signal intensities based on figure 2H.


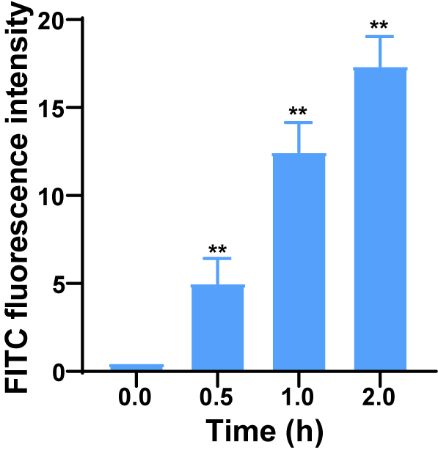


**Figure S3.** Quantitative analysis of cellular uptake of FITC-OVA@MMSNs@BM-Man at different incubation time points based on figure 3E. ***P*<0.01, compared with 0 h.


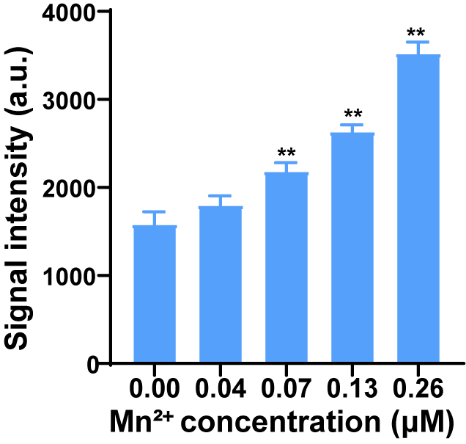


**Figure S4.** Quantitative analysis of cellular MR signal intensities based on figure 3F. ***P*<0.01, compared with 0.00 μM group.
